# Supplementary material for: Unveiling a Chemisorbed Crystallographically Heterogeneous Graphene/L10-FePd Interface with a Robust and Perpendicular Orbital Moment
Source: PubMed Central journal article supplement — ACS Nano. 2022 Feb 28;16(3):4139–51. doi: 10.1021/acsnano.1c09843 (PMC8945375; doi:10.1021/acsnano.1c09843), 2022-02-28
Supplement: nn1c09843_si_001.pdf [file nn1c09843_si_001.pdf]

# Unveiling chemisorbed crystallographically heterogeneous graphene/ $L1_0$ -FePd interface with robust and perpendicular orbital-moment

Hiroshi Naganuma,<sup>\*, †, ‡, §, #</sup> Masahiko Nishijima,<sup>⊥</sup> Hayato Adachi,<sup>+</sup> Mitsuharu Uemoto,<sup>+</sup> Hikari Shinya,<sup>§, †</sup> Shintaro Yasui,<sup>‡, §</sup> Hitoshi Morioka,<sup>¶</sup> Akihiko Hirata,<sup>£</sup> Florian Godel,<sup>€, ?</sup> Marie-Blandine Martin,<sup>€</sup> Bruno Dlubak,<sup>†, €</sup> Pierre Seneor,<sup>†, €, ?</sup> Kenta Amemiya<sup>†, ‡, #</sup>

<sup>†</sup> Center for Spintronics Integrated Systems (CSIS), Tohoku University, 2-2-1 Katahira Aoba-ku Sendai Miyagi, 980-8577 Japan

<sup>‡</sup> Center for Innovative Integrated Electronics Systems (CIES), Tohoku University, 468 -1 Aoba Aramaki Aoba-ku Sendai, Miyagi, 980-8572 Japan

<sup>§</sup> Center for Spintronics Research Network (CSRN), Tohoku University, 2-2-1 Katahira Aoba-ku Sendai Miyagi, 980-8577 Japan

<sup>#</sup> Graduate School of Engineering, Tohoku University, 6-6-05 Aoba Aramaki Aoba-ku Miyagi, 980-8579, Japan

<sup>⊥</sup> The electron microscopy center, Tohoku University, 2-2-1 Katahira Aoba-ku Sendai Miyagi, 980-8577 Japan

<sup>+</sup> Graduate School of Engineering, Kobe University, 1-1, Rokkodai, Nada-ku, Kobe, Hyogo, 657-8501 Japan

<sup>§</sup> Research Institute of Electrical Communication, 2-1-1 Katahira, Aoba-ku, Sendai, Miyagi 980-8577, Tohoku University, Japan

<sup>†</sup> Center for Spintronics Research Network (CSRN), Graduate School of Engineering Science, Osaka University, 1-1 Machikaneyama, Toyonaka, Osaka 560-8531, Japan

<sup>‡</sup> Laboratory for Advanced Nuclear Energy, Institute of Innovative Research, Tokyo Institute of Technology, 2-12-1 Ookayama, Meguro-ku, Tokyo, 152-8550, Japan

<sup>§</sup> Laboratory for Zero-Carbon Energy, Tokyo Institute of Technology, 2-12-1, Ookayama, Meguro-ku, Tokyo, 152-8550, Japan

<sup>¶</sup> Application Laboratory, Application Department, X-ray Division, Bruker Japan K. K., 3-9, Moriya, Kanagawa, Yokohama, Kanagawa 221-0022 Japan

<sup>£</sup> School of Fundamental Science and Engineering, Faculty of Science and Engineering, Waseda University, 3-4-1, Ookayama, Shinjuku-ku, Tokyo 169-8555 Japan

<sup>€</sup> Unité Mixte de Physique, CNRS/Thales, 91767 Palaiseau, France

<sup>?</sup> Université Paris-Saclay, 91767 Palaiseau, France

<sup>†</sup> Institute of Materials Structure Science, High Energy Accelerator Research Organization, Tsukuba, Ibaraki 305-0801, Japan

<sup>‡</sup> Department of Materials Structure Science, The Graduate University for Advanced Studies (SOKENDAI), Tsukuba, Ibaraki 305-0801, Japan

<sup>#</sup> Department of Chemistry, School of Science, The University of Tokyo, 7-3-1, Hongo, Bunkyo-ku, Tokyo, 113-8656 Japan

## Supporting Information

### Surface morphology of $L1_0$ -FePd and quality of graphene on $L1_0$ -FePd

Atomic force microscopy (AFM), (Fig. 1S) optical microscopy, (Fig. 2S left) and Raman spectroscopy (Fig. 2S right) observations were used to investigate surface morphology. The surface of  $L1_0$ -FePd without graphene (Gr) layer was evaluated by AFM. Gr layer grown on  $L1_0$ -FePd epitaxial film was characterized by optical microscopy and Raman spectroscopy mapping. These multiple surface observations revealed that the Gr/ $L1_0$ -FePd has homogeneous flat surface.

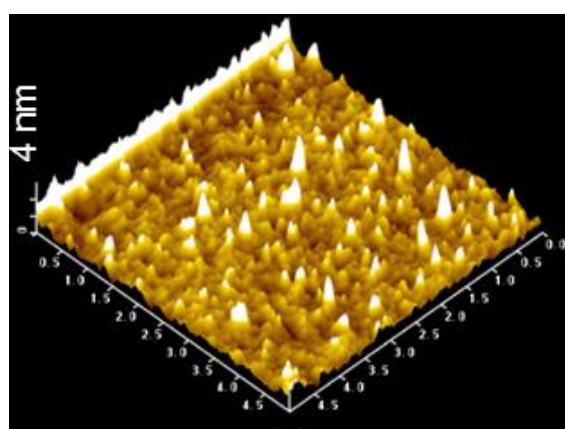

**Figure S1.** The surface morphology of  $L1_0$ -FePd film was evaluated by atomic forced microscopy (AFM, Oxford Instruments Cypher).

The AMF image is only FePd and Gr was not deposited yet. Then, the epitaxial  $L1_0$ -FePd film was grew on  $\text{SrTiO}_3$  (100) substrate and the AMF observation was carried out as soon as possible after growth of FePd to prevent the influence of surface oxidation. The tip with Pt/Ir coating on Si was used as cantilever. The signal was increased by driving at a resonance frequency of about 80 kHz. The area of  $5\mu\text{m}$  square was evaluated at five different points, and the average roughness was deduced. The surface flatness of  $R_a$  was 0.36 nm. This flat surface of  $L1_0$ -FePd can be used as a bottom ferromagnetic electrode of magnetic tunnel junctions (MTJs).

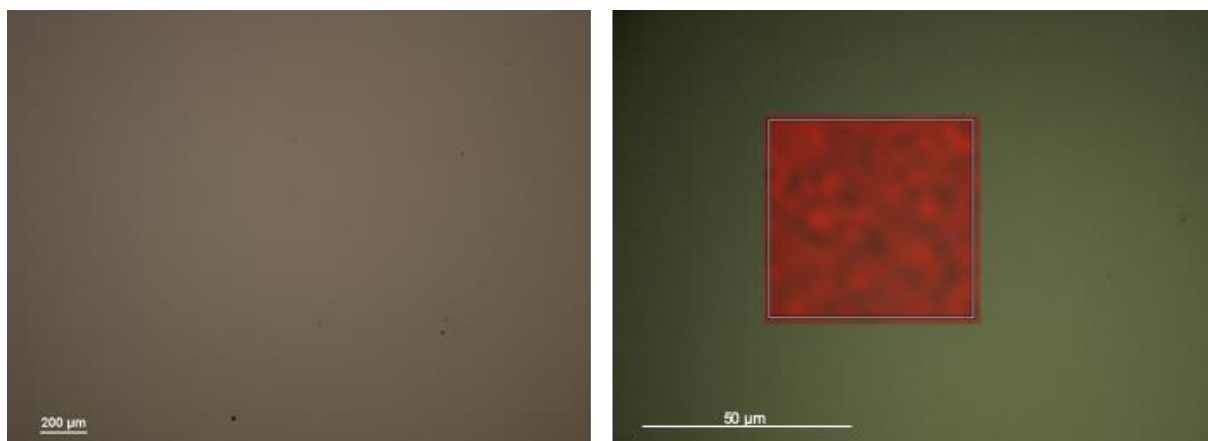

**Figure S2.** (left) Optical images taken after graphene (Gr) growth on  $L1_0$ -FePd surface and (right) superimposed Raman mapping of the graphene  $G$  peak signature (right inset). The optical microscopy and Raman spectroscopy observations we used in this study was Renishaw Raman InVia microscope, 532 nm excitation.

The optical microscopy image indicated the homogeneous contrast, and the pinhole was not confirmed in the wide area. The Raman spectroscopy was measured by  $G$  peak nature. It was confirmed that the graphene was covered homogeneously on the  $L1_0$ -FePd layer. This homogeneous graphene on the  $L1_0$ -FePd was as same as those of graphene on Cu and Ni.<sup>1)</sup>

#### **Reference for supporting information**

1. R. S. Weatherup, B. Dlubak, and S. Hofmann. Kinetic Control of Catalytic CVD for High-Quality Graphene at Low Temperatures, *ACS Nano*, **2012**, *6*, 9996-10003.
